# Supplementary material for: Nitrogen and phosphorus dual-doped graphene as a metal-free high-efficiency electrocatalyst for triiodide reduction
Source: Royal Society of Chemistry journal article supplement (doi:10.1039/c6nr00839a), 2016-01-01
Supplement: c6nr00839a1.pdf [file c6nr00839a1.pdf]

## **Electronic Supplementary Information**

### **Nitrogen and phosphorus dual-doped graphene as a metal-free high-efficiency electrocatalyst for triiodide reduction**

Chang Yu,<sup>‡</sup> Zhiqiang Liu,<sup>‡</sup> Xiangtong Meng, Bing Lu, Dan Cui, Jieshan Qiu\*

State Key Lab of Fine Chemicals, Liaoning Key Lab for Energy Materials and Chemical Engineering,  
PSU-DUT Joint Center for Energy Research, School of Chemical Engineering, Dalian University of  
Technology, Dalian 116024, China. E-mail: carbon@dlut.edu.cn

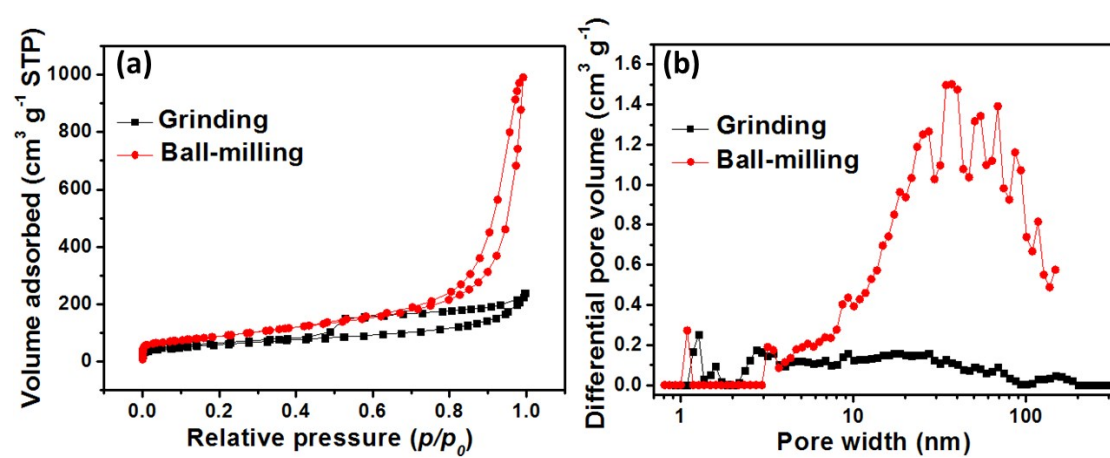

**Fig. S1** Nitrogen adsorption/desorption isotherms (a) and pore-size distributions (b) of NPG by grinding directly and ball-milling process.

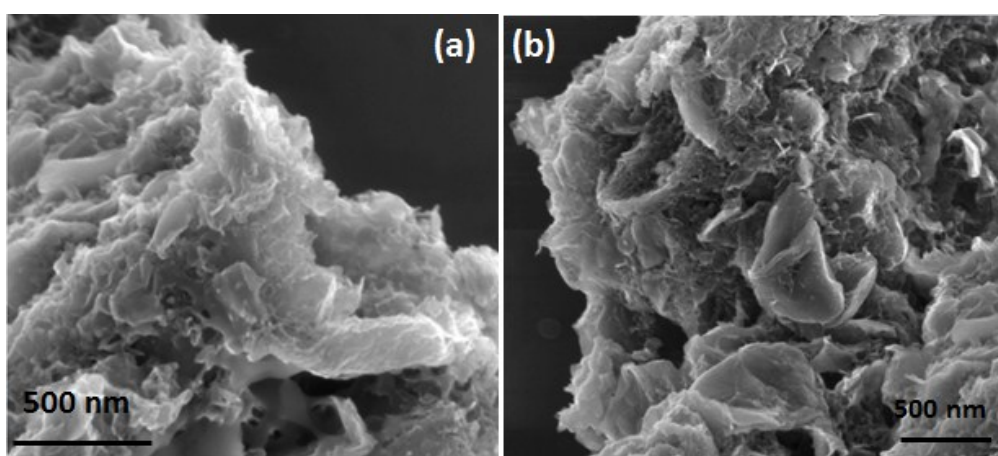

**Fig. S2** FE-SEM images of NG (a) and PG (b)

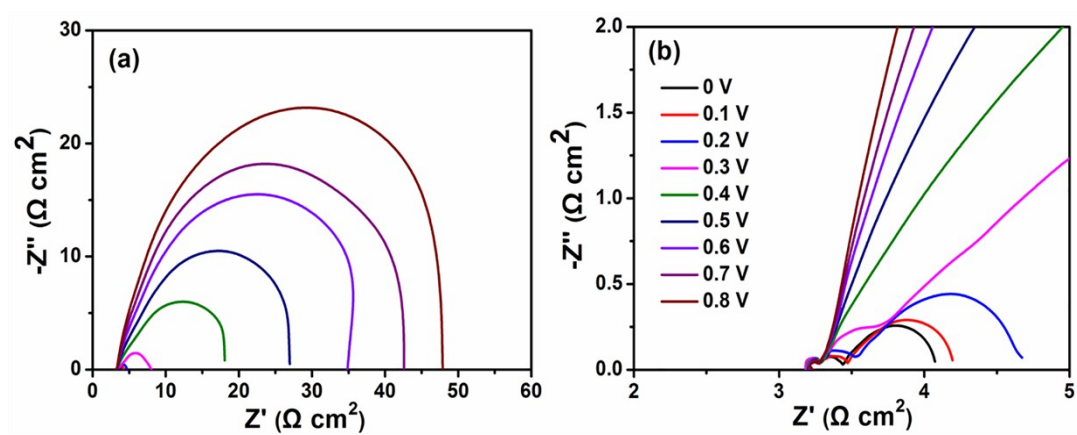

**Fig. S3** (a) Impedance spectra for NPG symmetric cell at various applied biases. (b) An expansion of the high frequency region. The legend in (b) is for (a) as well.

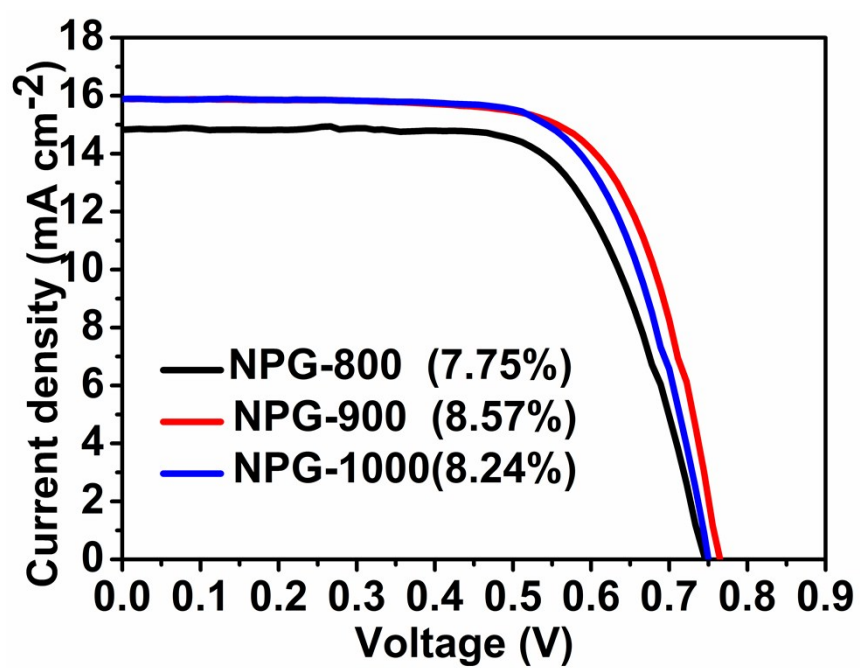

**Fig. S4** *J-V* curves of a series of NPG CEs made at different annealing temperatures and their power conversion efficiency.

**Table S1** Specific surface areas of the as-made samples

| Samples                | BET specific surface areas (m <sup>2</sup> g <sup>-1</sup> ) |
|------------------------|--------------------------------------------------------------|
| NG                     | 312                                                          |
| PG                     | 314                                                          |
| NPG (ball-milling)     | 325                                                          |
| NPG ( direct grinding) | 213                                                          |

Table S2 Elemental compositions of various samples derived from XPS.

|     | C (at. %) | O (at. %) | N (at. %) | P (at. %) |
|-----|-----------|-----------|-----------|-----------|
| NG  | 87.78     | 9.37      | 2.85      | —         |
| PG  | 88.64     | 10.12     | —         | 1.24      |
| NPG | 86.73     | 9.86      | 2.49      | 0.92      |

**Table S3** Electrochemical parameters for various CEs.

| Samples | $E_{pp}$ (V) | $J_{Ared}$ (mA cm <sup>-2</sup> ) | $R_s$ ( $\Omega$ cm <sup>2</sup> ) | $R_{ct}$ ( $\Omega$ cm <sup>2</sup> ) | $Z_N$ ( $\Omega$ cm <sup>2</sup> ) |
|---------|--------------|-----------------------------------|------------------------------------|---------------------------------------|------------------------------------|
| Pt      | 0.37         | 1.22                              | 4.54                               | 2.71                                  | 0.98                               |
| PG      | 0.23         | 2.32                              | 2.11                               | 0.30                                  | 0.80                               |
| NG      | 0.25         | 2.42                              | 1.82                               | 0.26                                  | 0.83                               |
| NPG     | 0.19         | 4.57                              | 1.61                               | 0.14                                  | 0.82                               |
